# Supplementary material for: Intramolecular crankshaft-type rearrangement in a photoisomerised glycoconjugate
Source: Royal Society of Chemistry journal article supplement (doi:10.1039/d3ra01678a), 2023-01-01
Supplement: d3ra01678a1.pdf [file d3ra01678a1.pdf]

## SUPPLEMENTARY INFORMATION

### Intramolecular crankshaft-type rearrangement in a photoisomerised glycoconjugate.

Michal Hricovíni,<sup>a</sup> James R. Asher<sup>b</sup> and Miloš Hricovíni<sup>a\*</sup>

<sup>a</sup> *Institute of Chemistry, Slovak Academy of Sciences, Dúbravská cesta 9, 845 38 Bratislava, Slovak Republic*

<sup>b</sup> *Institute of Inorganic Chemistry, Slovak Academy of Sciences, Dúbravská cesta 9, 845 36 Bratislava; Faculty of Natural Sciences, Department of Inorganic Chemistry, Comenius University, Mlynská Dolina, CH2, 84215, Bratislava, Slovak Republic.*

#### Contents:

Fig. S1 – 2D NMR <sup>1</sup>H-<sup>13</sup>C coupled HSQC spectrum (expansion) of **1** in DMSO at 25°C

Fig. S2 – 2D NOESY spectrum of **1** in DMSO at 25°C

Table S1 – <sup>1</sup>H chemical shifts of **1** in DMSO at 25°C (referenced to TMS).

Table S2 – <sup>1</sup>H chemical shifts of –N=C(H) and –OH(2) protons in **1** at various temperatures (20°C – 65°C) in DMSO.

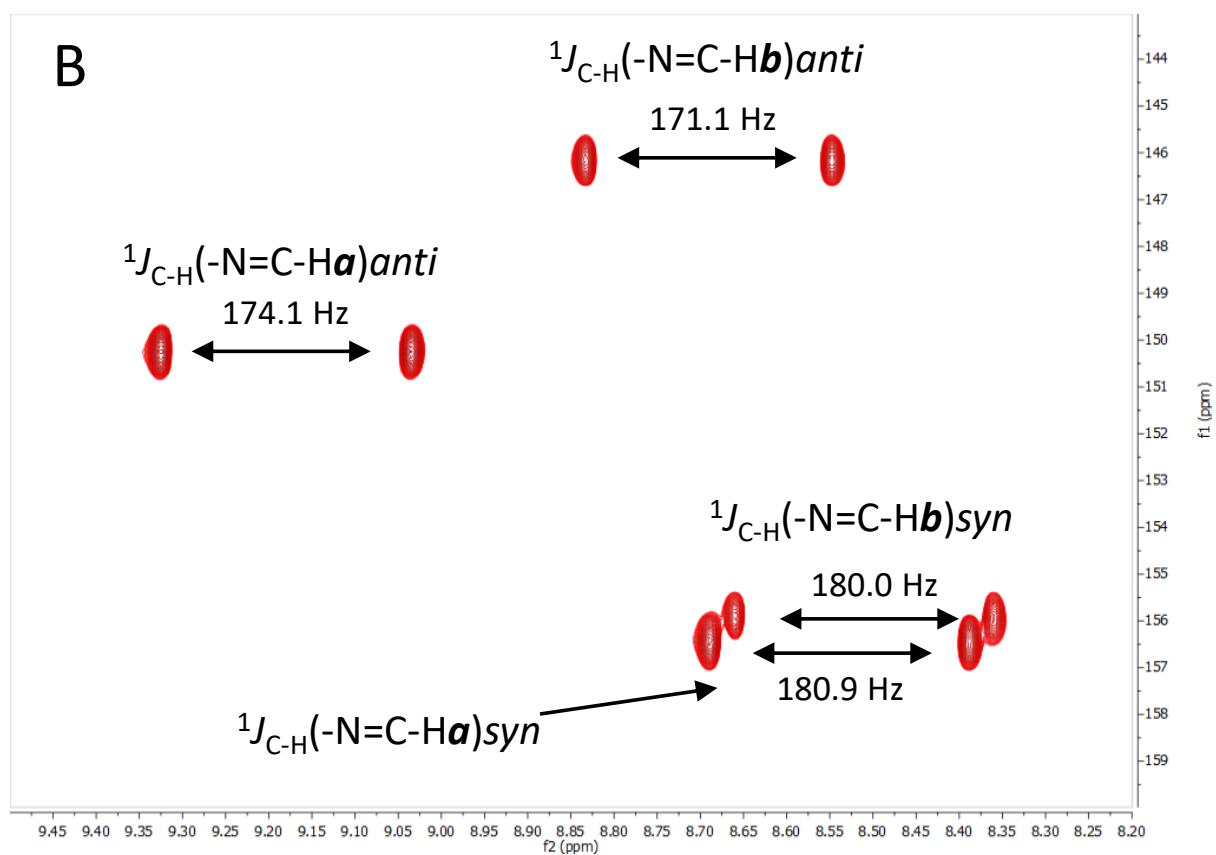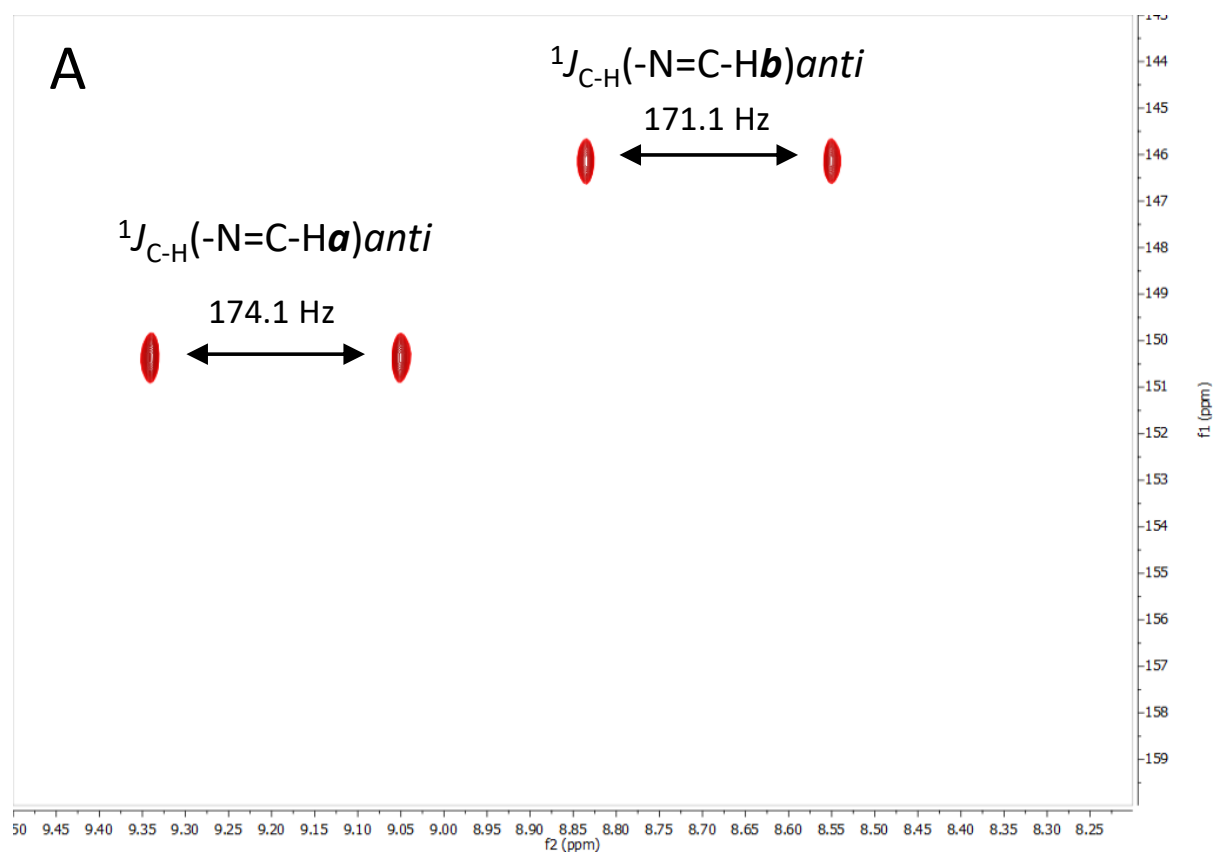

**Fig. S1** Expansion of 2D NMR  $^1\text{H}$ - $^{13}\text{C}$  coupled HSQC spectrum showing the azomethine group signals originating from the two conformers (**a** and **b**) for *anti*- and *syn*-forms. (A): spectrum before irradiation (pure *anti*); (B): spectrum after irradiation (~1:1 mixture of *syn* and *anti*).

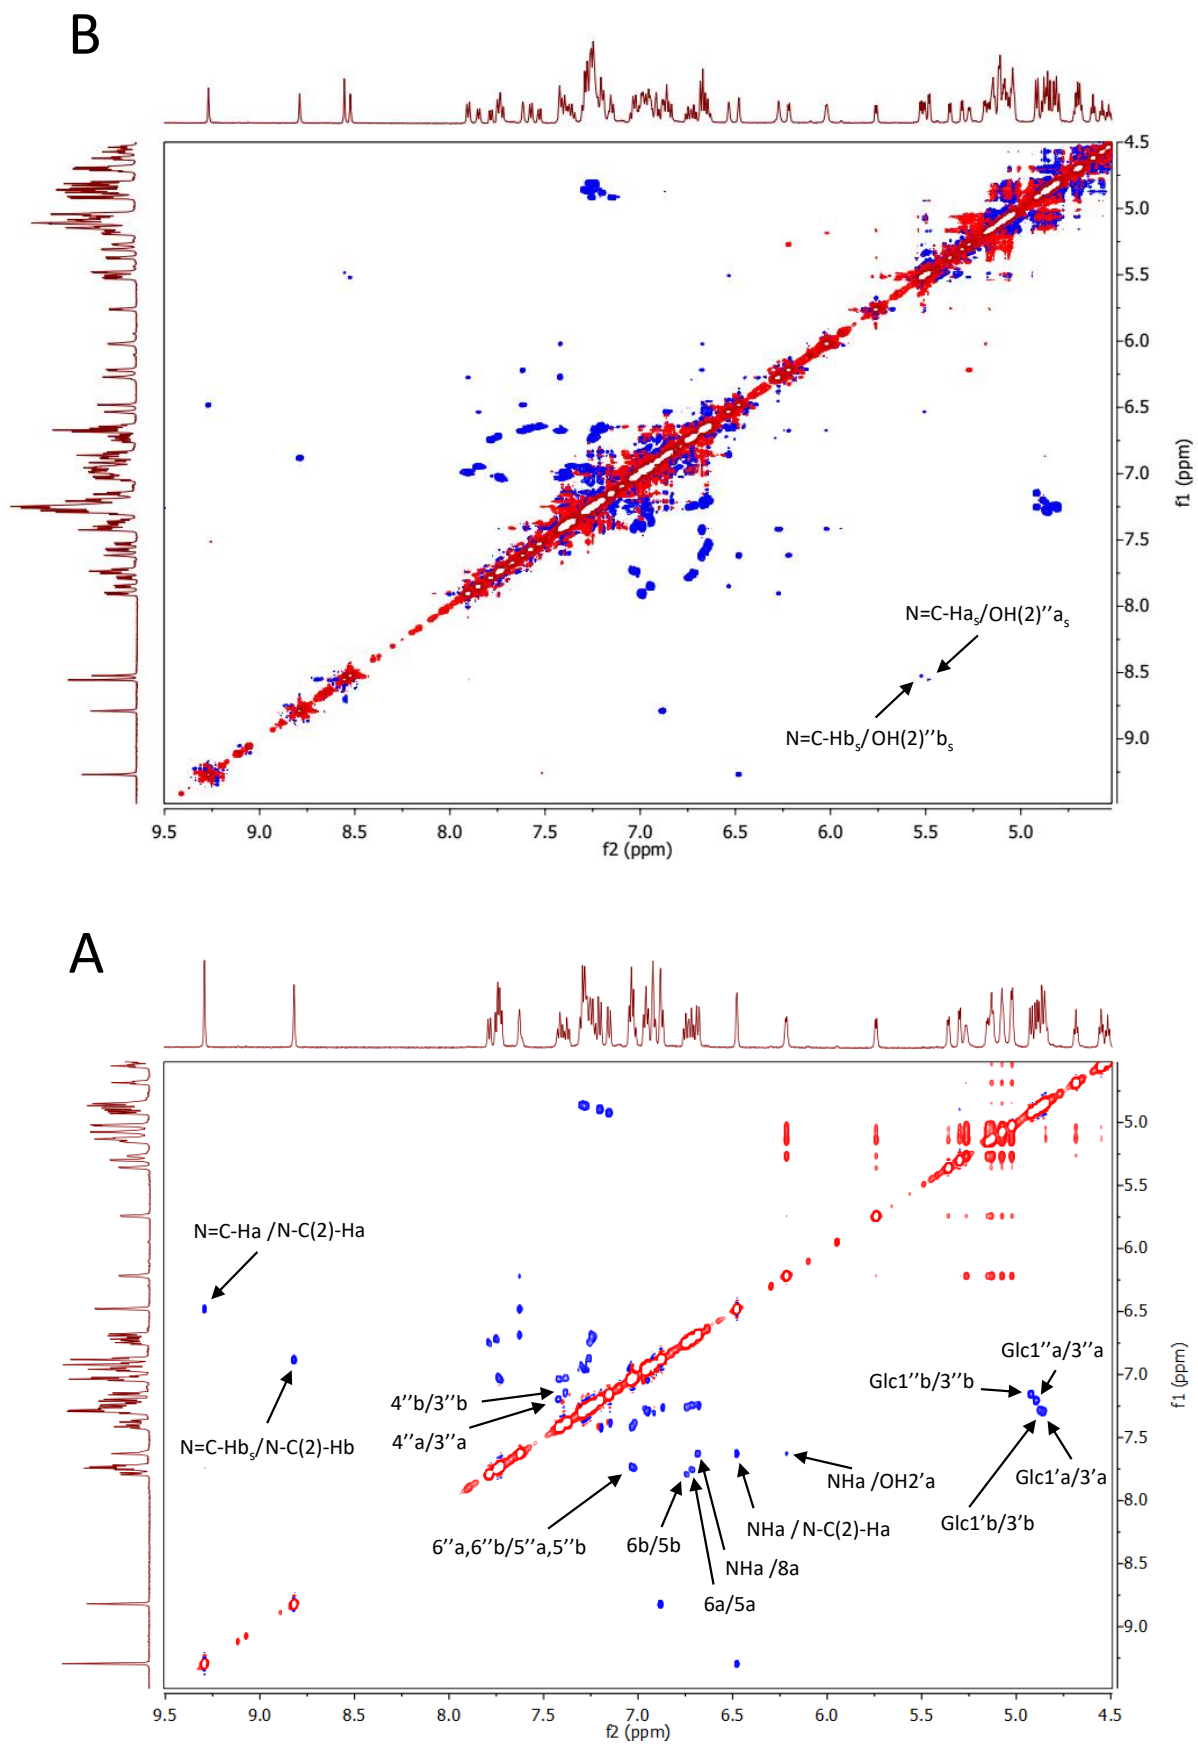

**Fig. S2** 2D NOESY spectrum (signals from aromatic protons) of **1** in DMSO at 25°C showing some of the most important dipolar interactions in the *anti*- and *syn*-forms. (A): spectrum before irradiation (pure *anti*); (B): spectrum after irradiation (~ 1:1 mixture of *syn* and *anti*).

**Table S1**  $^1\text{H}$  chemical shifts of **1** in DMSO at 25°C (referenced to TMS). The values are listed for the two different conformations **a** and **b**.

|                        | <b>a</b>          | <b>b</b>          |               |               |
|------------------------|-------------------|-------------------|---------------|---------------|
| <b>=C-H</b>            | 9.28              | 8.81              |               |               |
| <b>-N-H</b>            | 7.62              | 7.27              |               |               |
| <b>2</b>               | 6.48              | 6.88              |               |               |
| <b>5</b>               | 7.74              | 7.79              |               |               |
| <b>6</b>               | 6.75              | 6.72              |               |               |
| <b>7</b>               | 7.27              | 7.24              |               |               |
| <b>8</b>               | 6.68              | 6.87              |               |               |
| <b>3'</b>              | 7.29 <sup>a</sup> | 7.28 <sup>a</sup> |               |               |
| <b>4'</b>              | 7.28 <sup>a</sup> | 7.28 <sup>a</sup> |               |               |
| <b>5'</b>              | 6.96 <sup>a</sup> | 6.94 <sup>a</sup> |               |               |
| <b>6'</b>              | 6.92 <sup>a</sup> | 6.95 <sup>a</sup> |               |               |
| <b>3''</b>             | 7.20              | 7.15              |               |               |
| <b>4''</b>             | 7.41              | 7.38              |               |               |
| <b>5''</b>             | 7.03              | 7.03              |               |               |
| <b>6''</b>             | 7.75              | 7.73              |               |               |
|                        | <b>Glc'a</b>      | <b>Glc'b</b>      | <b>Glc''a</b> | <b>Glc''b</b> |
| <b>1</b>               | 4.86              | 4.87              | 4.89          | 4.92          |
| <b>2</b>               | 3.49              | 3.52              | 3.25          | 3.26          |
| <b>3</b>               | 3.39              | 3.81              | 3.26          | 3.30          |
| <b>4</b>               | 3.25              | 3.20              | 3.22          | 3.16          |
| <b>5</b>               | 3.38              | 3.38              | 3.21          | 3.22          |
| <b>6<sub>a</sub></b>   | 3.82              | 3.78              | 3.71          | 3.66          |
| <b>6<sub>b</sub></b>   | 3.26              | 3.54              | 3.51          | 3.43          |
| <b>-OH<sub>2</sub></b> | 6.23              | 5.80              | 5.32          | 5.40          |
| <b>-OH<sub>3</sub></b> | 5.26              | 5.14              | 5.08          | 5.15          |
| <b>-OH<sub>4</sub></b> | 5.13              | 5.07              | 5.03          | 5.03          |
| <b>-OH<sub>6</sub></b> | 4.69              | 4.86              | 4.56          | 4.52          |

<sup>a</sup> approximate values due to high-order spin system

**Table S2.**  $^1\text{H}$  chemical shifts of  $-\text{N}=\text{C}(\text{H})$  and  $-\text{OH}(2)$  protons in **1** at various temperatures ( $20^\circ\text{C}$ – $65^\circ\text{C}$ ) in DMSO. The values are listed for the two different conformations **a** and **b**. The temperature coefficients ( $\text{ppb}/\text{K}$ ), computed from the chemical shift variations, are listed in the last column.

|              |                                     | (20°C) | (25°C) | (35°C) | (45°C) | (55°C) | (65°C) | ppb/K |
|--------------|-------------------------------------|--------|--------|--------|--------|--------|--------|-------|
| <b>anti-</b> | $-\text{N}=\text{CH}-$ ( <b>a</b> ) | 9.216  | 9.220  | 9.227  | 9.230  | 9.234  | 9.235  | 0.42  |
|              | $-\text{N}=\text{CH}-$ ( <b>b</b> ) | 8.714  | 8.732  | 8.768  | 8.799  | 8.829  | 8.855  | -3.13 |
|              | $-\text{OH}_2'$ ( <b>a</b> )        | 6.257  | 6.227  | 6.163  | 6.099  | 6.035  | *      | -6.34 |
|              | $-\text{OH}_2'$ ( <b>b</b> )        | 5.833  | 5.796  | 5.717  | 5.641  | 5.567  | *      | -7.60 |
|              | $-\text{OH}_2''$ ( <b>a</b> )       | 5.360  | 5.323  | 5.247  | 5.171  | 5.098  | *      | -7.49 |
|              | $-\text{OH}_2''$ ( <b>b</b> )       | 5.425  | 5.395  | 5.329  | 5.263  | 5.198  | *      | -6.49 |
| <b>syn-</b>  | $-\text{N}=\text{CH}-$ ( <b>a</b> ) | 8.546  | 8.546  | 8.545  | 8.544  | 8.543  | 8.539  | -0.16 |
|              | $-\text{N}=\text{CH}-$ ( <b>b</b> ) | 8.519  | 8.517  | 8.510  | 8.504  | 8.500  | 8.493  | -0.58 |
|              | $-\text{OH}_2'$ ( <b>a</b> )        | 6.069  | 6.041  | 5.982  | 5.922  | 5.862  | *      | -5.91 |
|              | $-\text{OH}_2'$ ( <b>b</b> )        | 5.572  | 5.542  | 5.470  | 5.416  | 5.345  | *      | -6.49 |
|              | $-\text{OH}_2''$ ( <b>a</b> )       | 5.550  | 5.518  | 5.451  | 5.385  | 5.320  | *      | -6.57 |
|              | $-\text{OH}_2''$ ( <b>b</b> )       | 5.590  | 5.557  | 5.488  | 5.421  | 5.353  | *      | -6.77 |

\* not measured due to spectral overlap
